# Supplementary material
Source: publisher figshare collection journal article supplement (https://acs.figshare.com/ndownloader/files/17569502)
Supplement: Supplementary file 1 [file 17569502]

# Supporting information

## **Enhanced chemical stability, intestinal absorption, and intracellular antioxidant activity of cyanidin-3-*O*-glucoside by composite nanogel encapsulation**

Jin Feng,<sup>\*,†</sup> Yinghui Wu,<sup>†</sup> Lixia Zhang,<sup>†</sup> Ying Li,<sup>†</sup> Songbai Liu,<sup>‡</sup> Hua Wang,<sup>§</sup> and  
Chunyang Li<sup>\*,†</sup>

<sup>†</sup> Institute of Agro-product Processing, Jiangsu Academy of Agricultural Sciences, 50  
Zhongling Street, Nanjing 210014, China

<sup>‡</sup> Department of Food Science and Nutrition, Zhejiang University, 866 Yuhangtang  
Road, Hangzhou 310058, China

<sup>§</sup> Center of Analysis and Measurement, Zhejiang University, 866 Yuhangtang Road,  
Hangzhou 310058, China

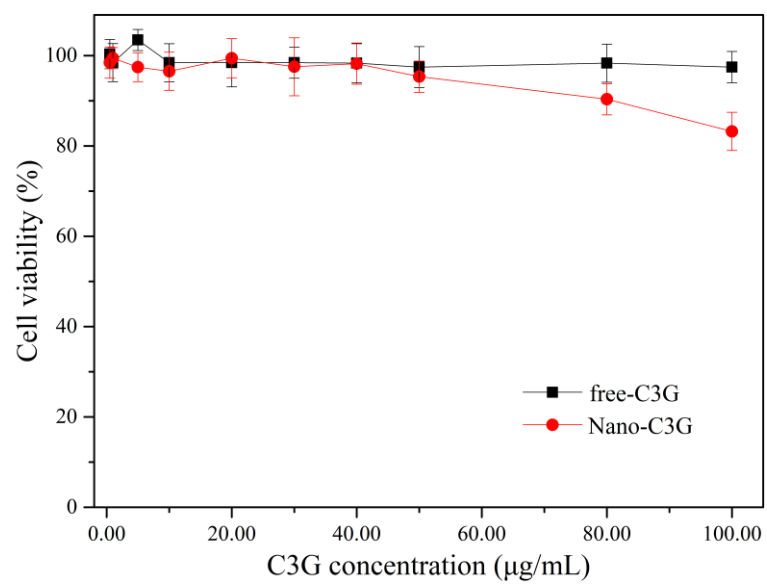

**Figure S1.** Cytotoxicity of free- and nano-C3G on Caco-2 cells.

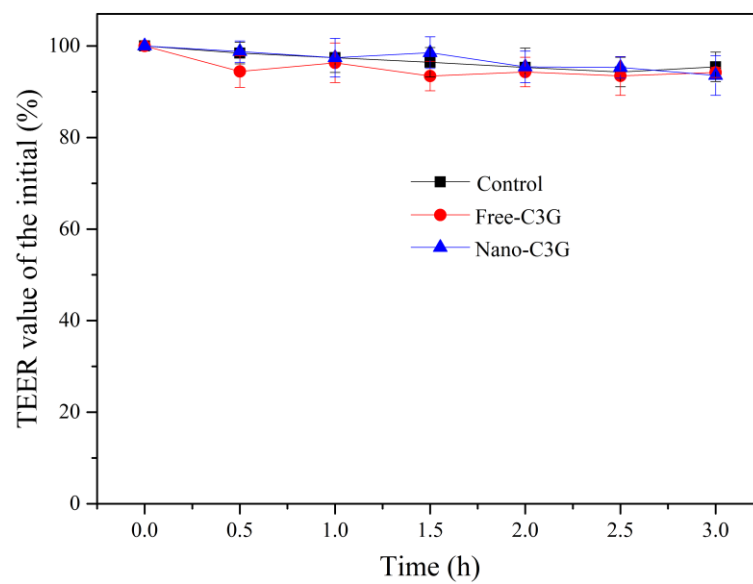

**Figure S2.** Effect of free- and nano-C3G on the TEER values of Caco-2 monolayers during the intestinal permeation study.
